# Supplementary material
Source: Springer Nature journal article supplement (https://www.springermedizin.de/resource/supplementary/12913_2009_1195_MOESM1_ESM.pdf/9528338)

# Reported Syphilis Cases

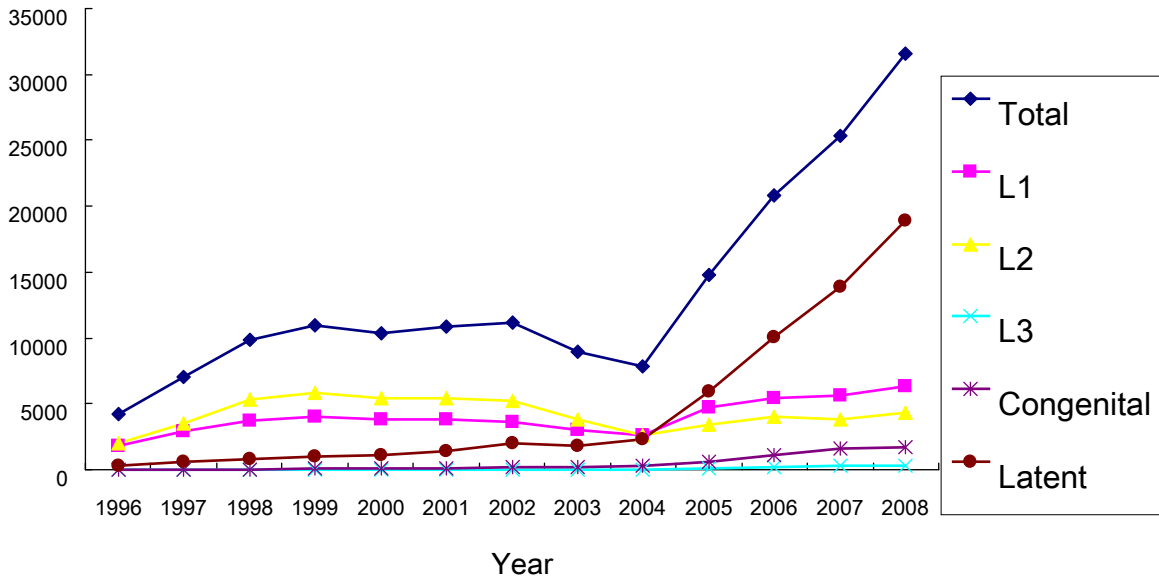

Supplement: MOESM1 [file 9528338]
